# Supplementary material for: A multifunctional hydrogel dressing with antibacterial properties for effective wound healing
Source: Royal Society of Chemistry journal article supplement (doi:10.1039/d1dt04128b), 2022-01-01
Supplement: d1dt04128b1.pdf [file d1dt04128b1.pdf]

## Supporting Information

### A multifunctional hydrogel dressing for effective wound antibacterial and healing

Ye Zhang <sup>a</sup>, Dan Yang<sup>a</sup>, Wei Guo <sup>a,b\*</sup>, Feng Zhang <sup>a</sup>, Huiming Lin, Kai Yu, Chunyu Yang<sup>a\*</sup>,  
Fengyu Qu <sup>a\*</sup>

<sup>a</sup> Key Laboratory of Photochemical Biomaterials and Energy Storage Materials, College of Chemistry and Chemical Engineering, Harbin Normal University, Harbin, Heilongjiang, 150025, China

<sup>b</sup> Key Laboratory for Photonic and Electronic Bandgap Materials, Ministry of Education, College of Chemistry and Chemical Engineering, Harbin Normal University, Harbin, Heilongjiang, 150025, China.

---

\* Corresponding author.

*E-mail address:* guowei@hrbnu.edu.cn (W. Guo)

*E-mail address:* ycy@hrbnu.edu.cn (C. Y. Yang)

*E-mail address:* qufengyu@hrbnu.edu.cn (F. Y. Qu)

**Table S1.** Ag content of different samples prepared with different concentrations of NaBH<sub>4</sub>.

| NaBH <sub>4</sub> | 2.5 mM | 5 mM | 10 mM |
|-------------------|--------|------|-------|
| Ag (Atomic %)     | 4.41   | 8.54 | 9.86  |

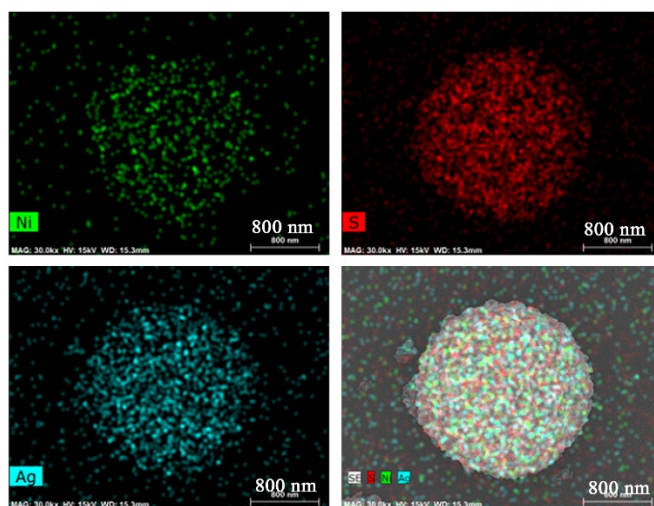

**Fig.S1** SEM-EDS mapping of Ag(8.5%)@NiS<sub>2-x</sub>.

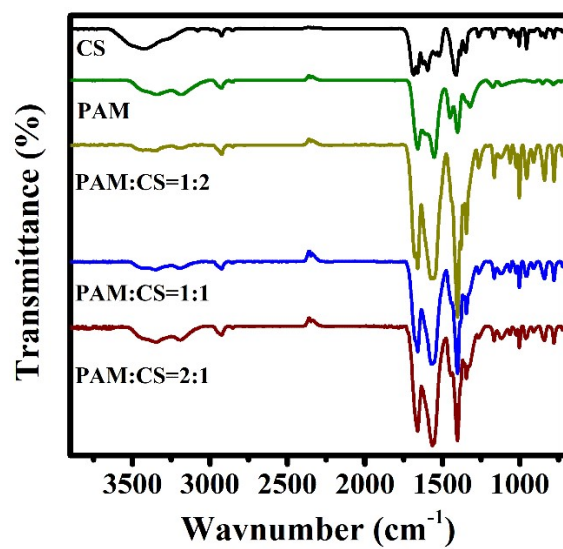

**Fig. S2** FT-IR spectra of chitosan, polyacrylamide, and PAM/CS hydrogels.

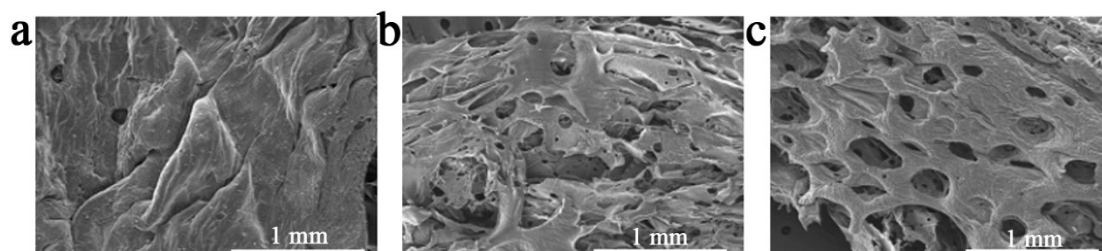

**Fig.S3** Low-magnification SEM images of (a) dressing-2:1, (b) dressing-1:1, and (c) dressing-1:2.

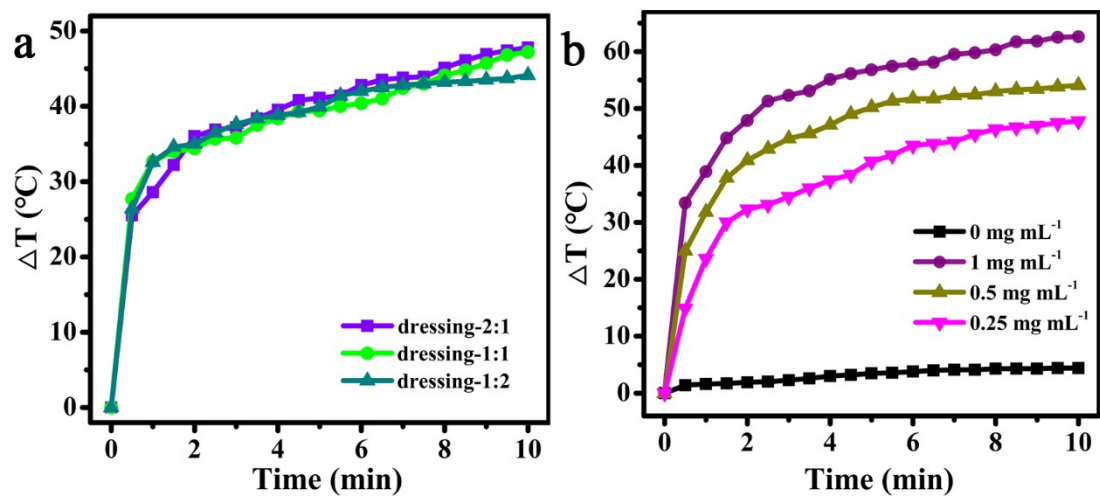

**Fig.S4** (a) Photothermal curves of different dressings under irradiation of NIR laser. (b) Photothermal curves of dressing-2:1 containing different concentration of  $\text{Ag}(8.5\%)\text{@NiS}_{2-x}$ .

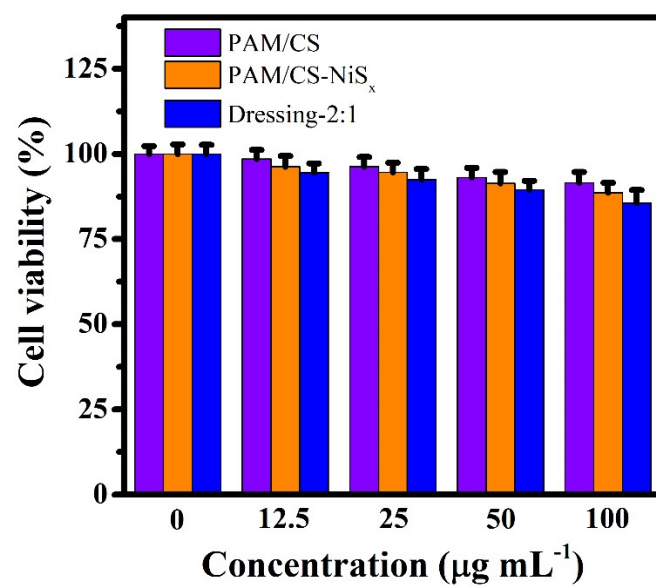

**Fig. S5** Relative cell viability after treatment with various concentrations of PAM/CS, PAM/CS-NiS<sub>x</sub> and dressing 2:1.

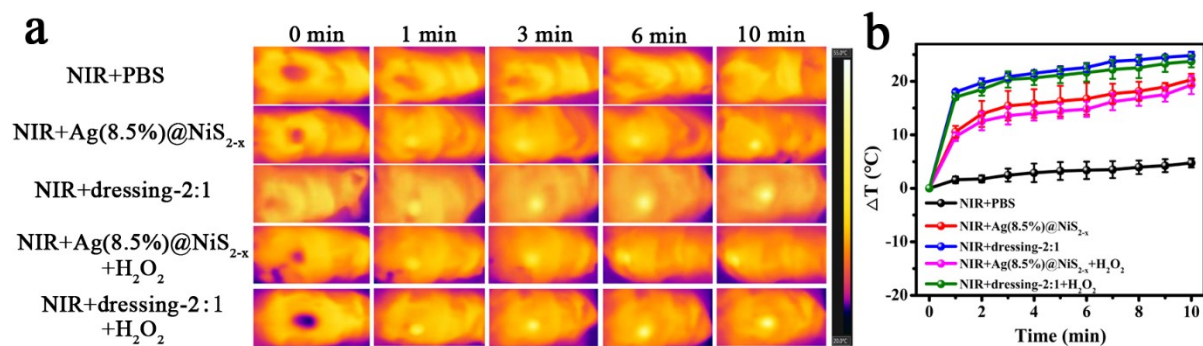

**Fig.S6** (a) Infrared thermal images of mice and (b) corresponding temperature curves.
